# Supplementary material
Source: Copernicus journal article supplement (doi:10.5194/acp-26-5603-2026)
Supplement: Supplementary file 1 [file acp-26-5603-2026-supplement.pdf]

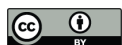

*Supplement of*

## **The diurnal cycle and temperature dependence of crystal shapes in ice clouds from satellite lidar polarized measurements**

**Vincent Noel et al.**

*Correspondence to:* Vincent Noel ([vincent.noel@cnrs.fr](mailto:vincent.noel@cnrs.fr))

The copyright of individual parts of the supplement might differ from the article licence.

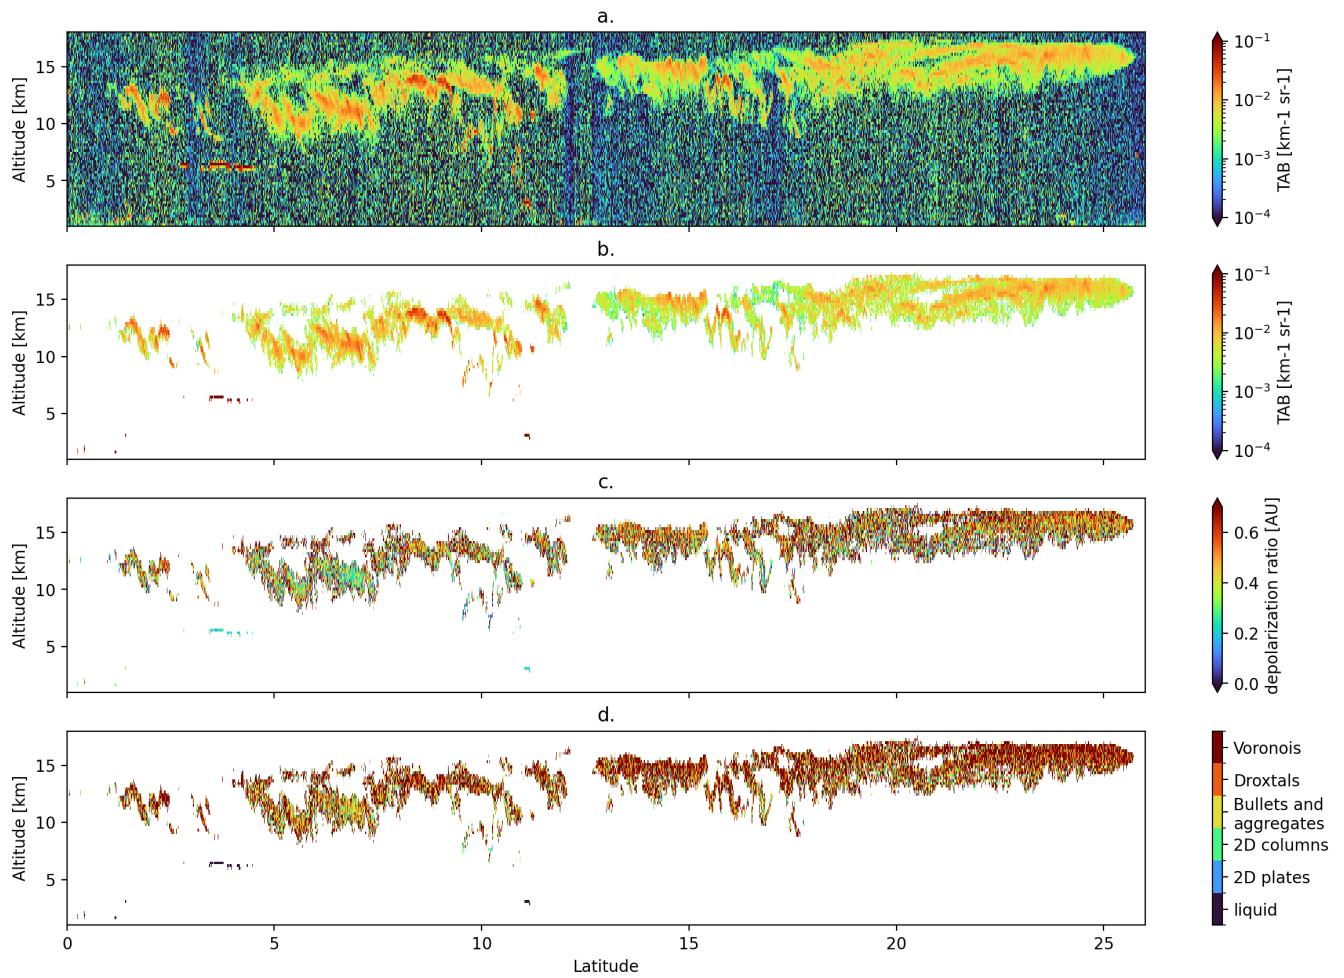

**Figure S1: Same as Figure 1, for a segment of the 2015-08-05T08-03-51T08-52-30UTC overpass above the Pacific Ocean in daytime conditions.**

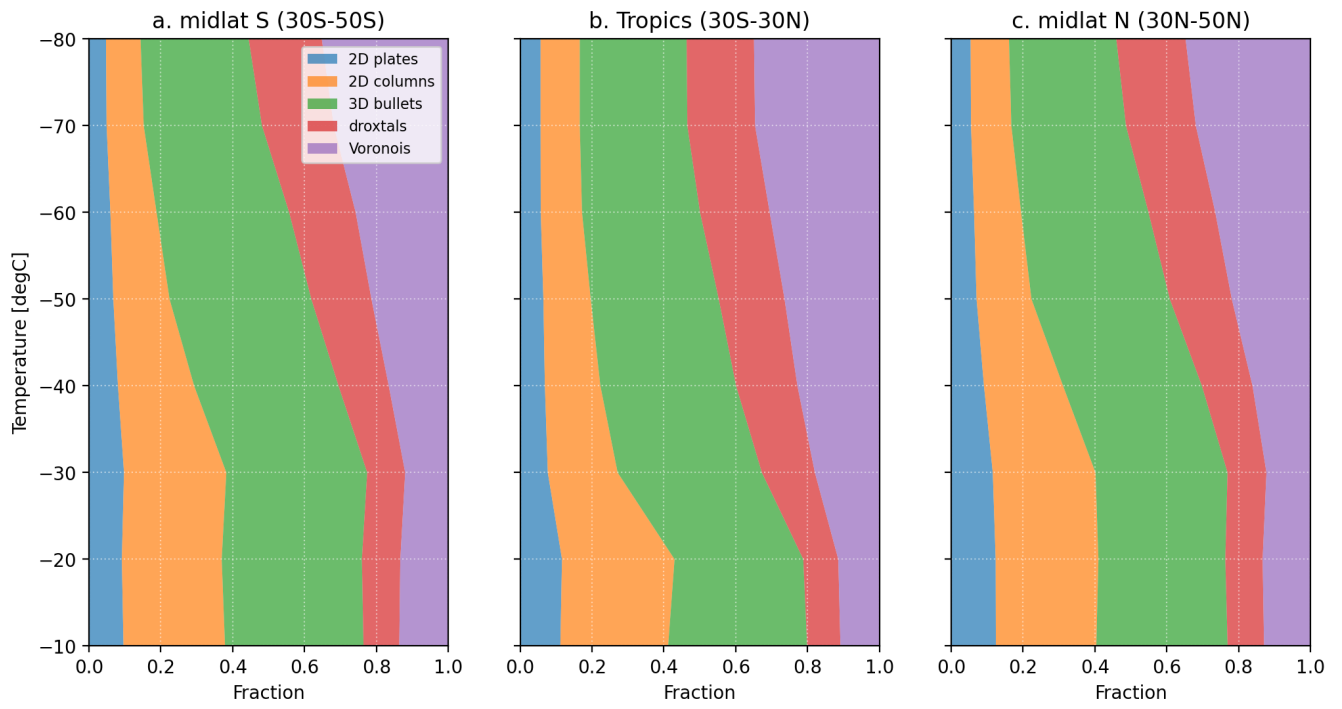

5

**Figure S2: same as Fig. 3, during daytime.**

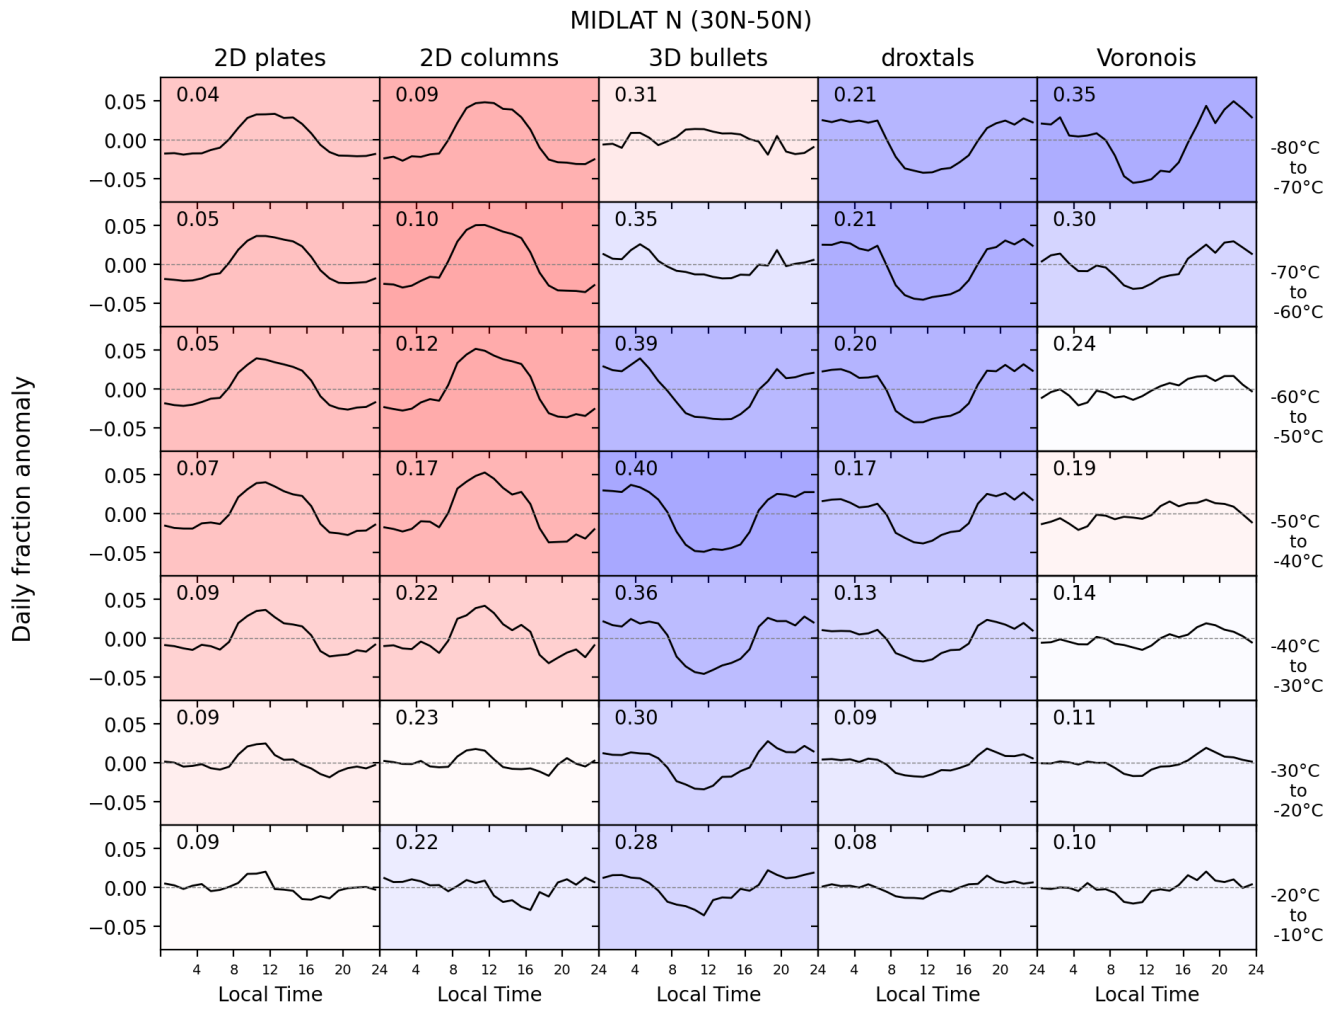

10 **Figure S3.** Same as Fig. 4, in the North hemisphere midlatitudes (30°N-50°N).

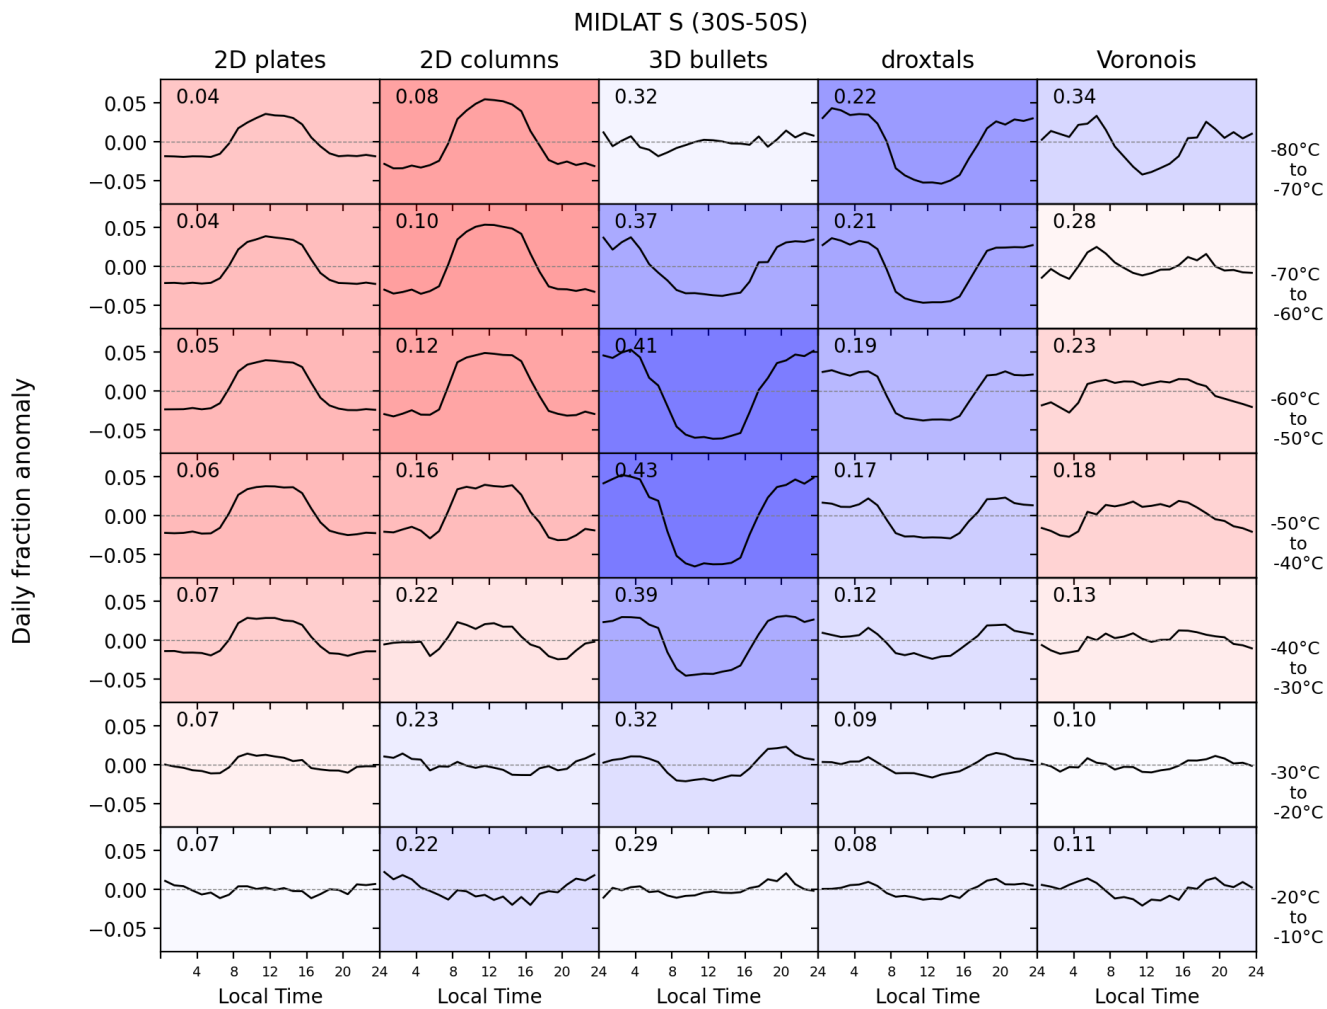

Figure S4. Same as Fig. 4, in the South hemisphere midlatitudes (30°S-50°S).

TROPICS (30S-30N)

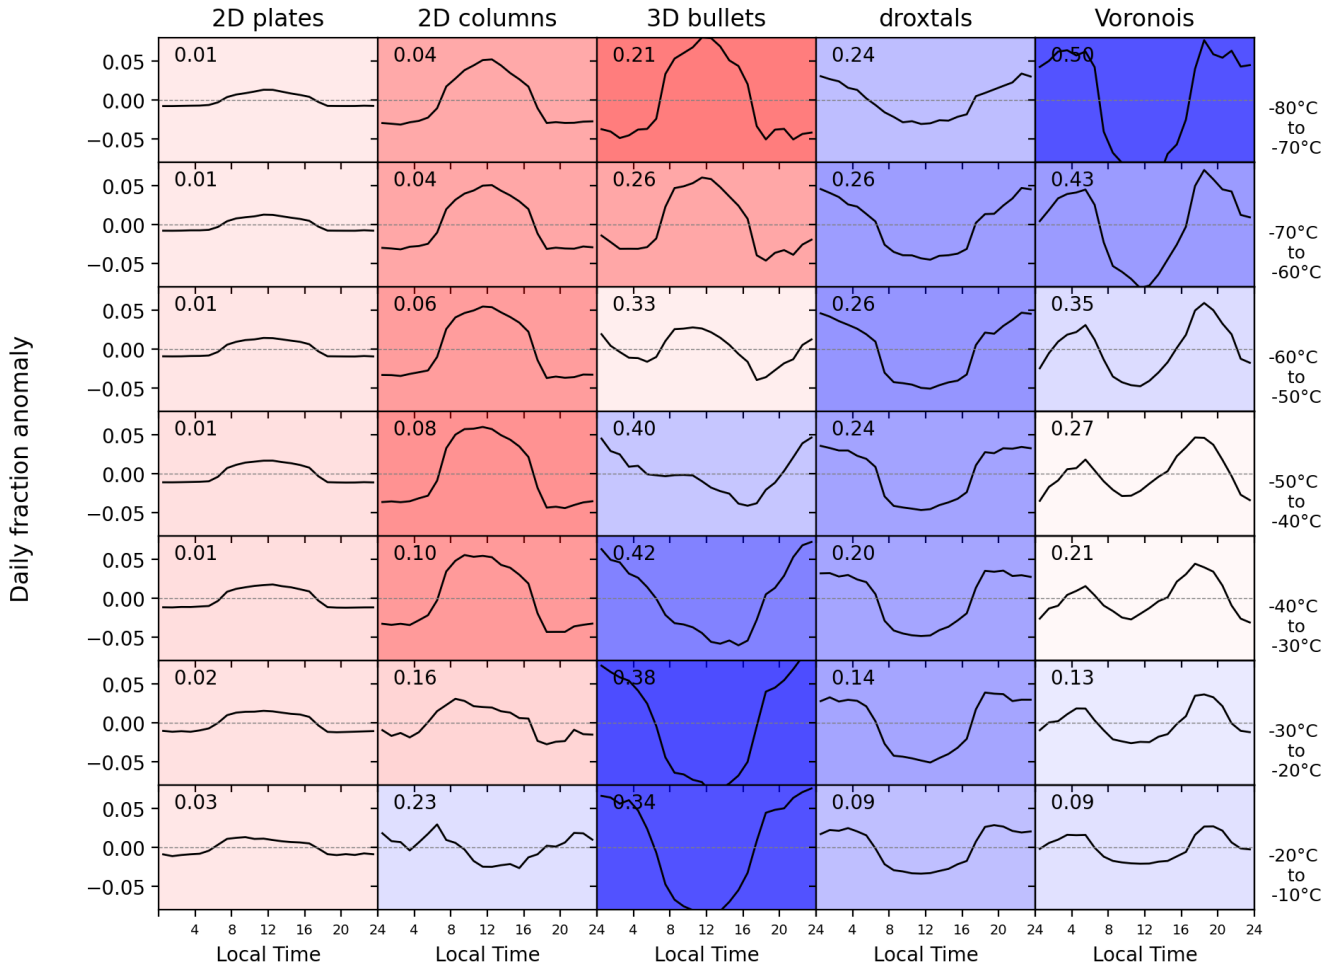

15

Figure S5: Same as Fig. 4 using a fixed TAB cloud detection threshold

MIDLAT N (30N-50N)

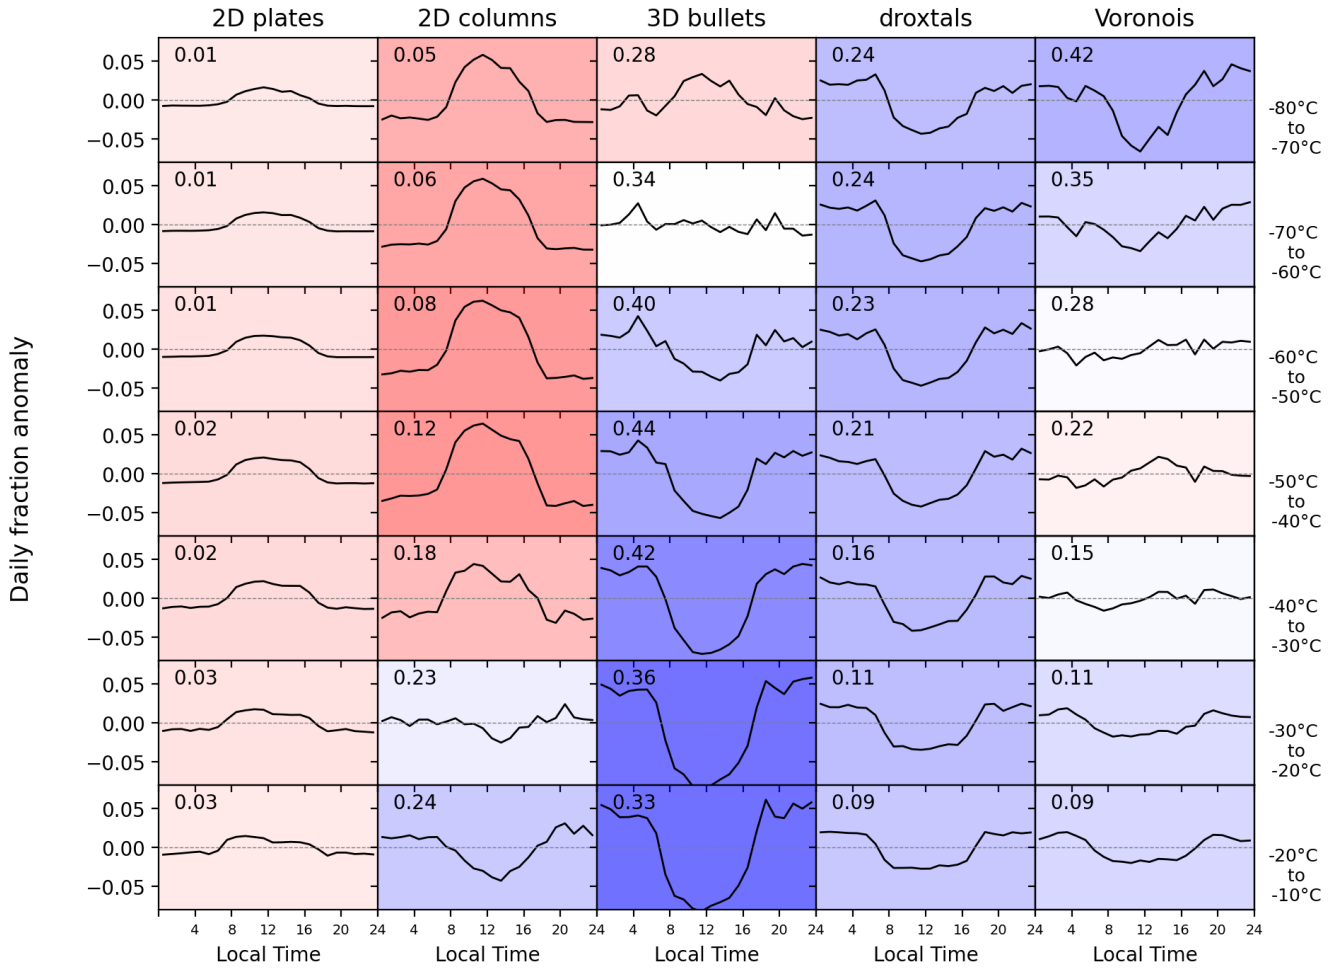

Figure S6. Same as Fig. S3 using a fixed TAB cloud detection threshold

MIDLAT S (30S-50S)

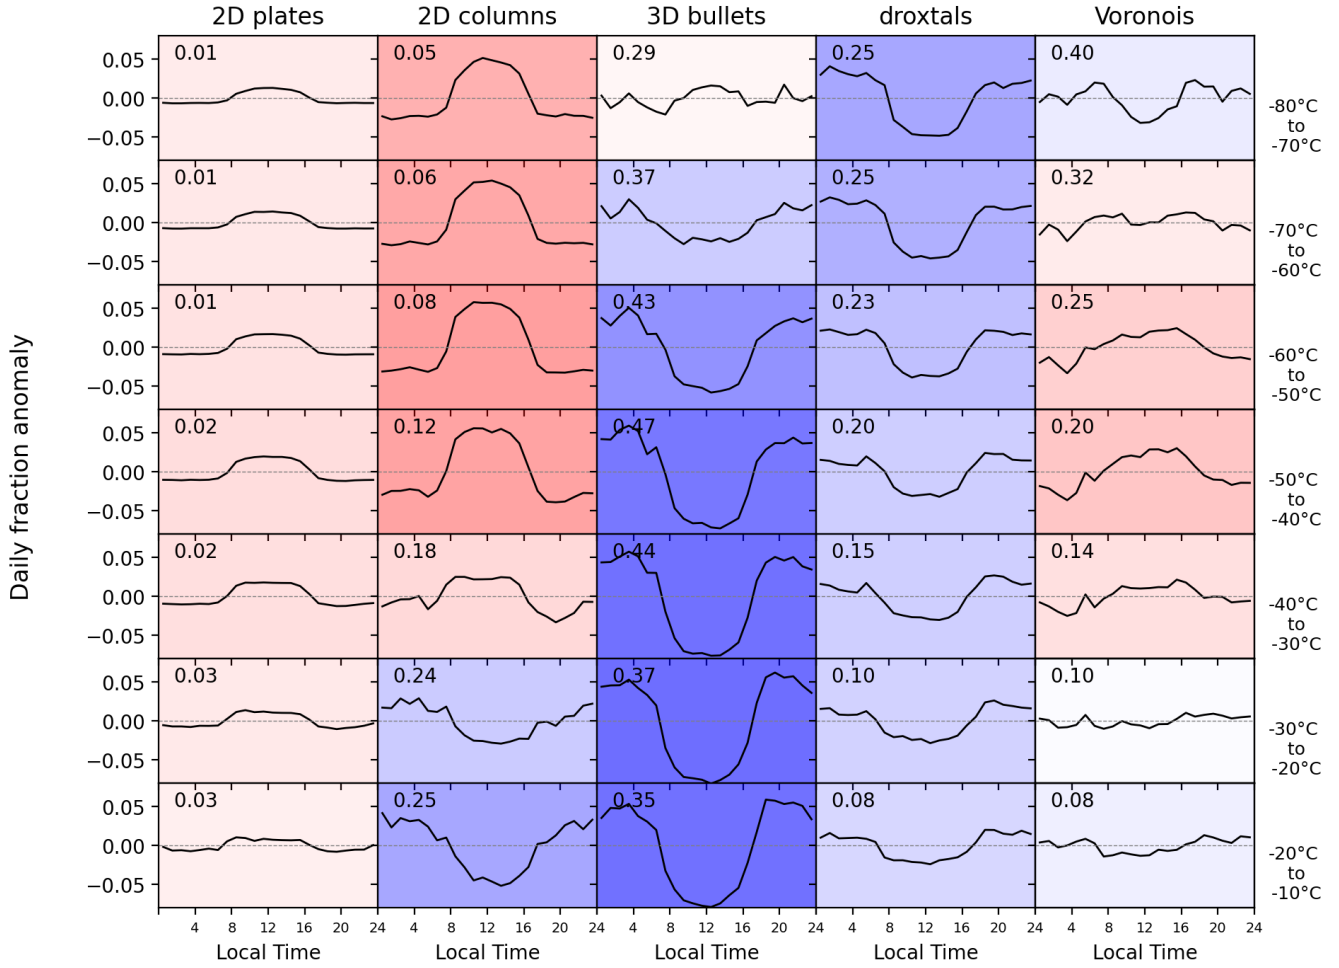

Figure S7. Same as Fig. S4 using a fixed TAB cloud detection threshold
